# Supplementary material
Source: MDPI journal article supplement (https://www.mdpi.com/2073-4441/14/10/1618)
Supplement: s1 [file s1]

Supplemental Material:

Ordinary Least Squares Regression and Spearman's  $\rho$  Results

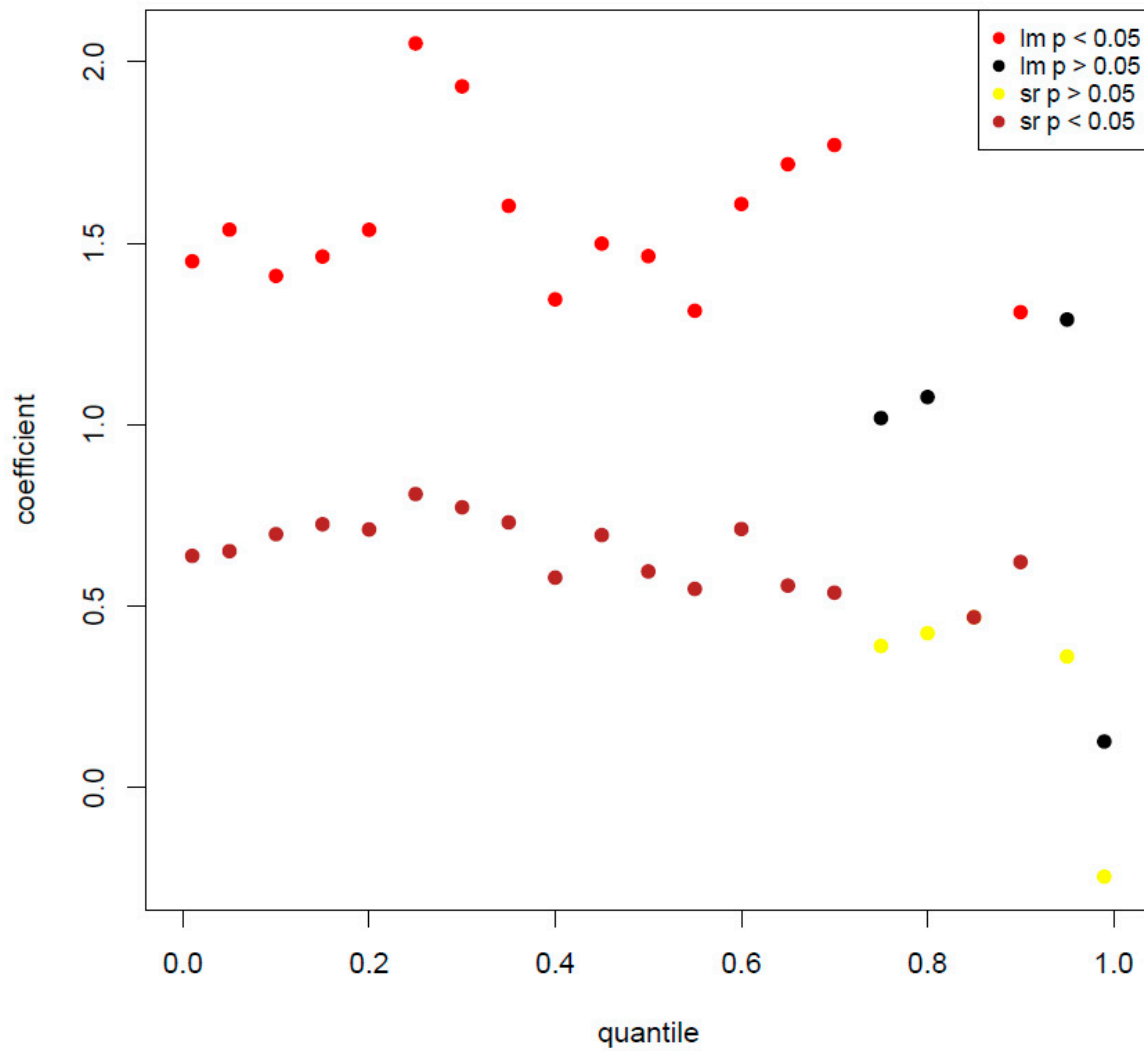

**Figure S1. Trend and correlation significance between confinement ratio and top width error for the 1% AEP flow at Bronx Wash. “lm” indicates the ordinary least squares regression and “sr” indicates Spearman's  $\rho$ .**

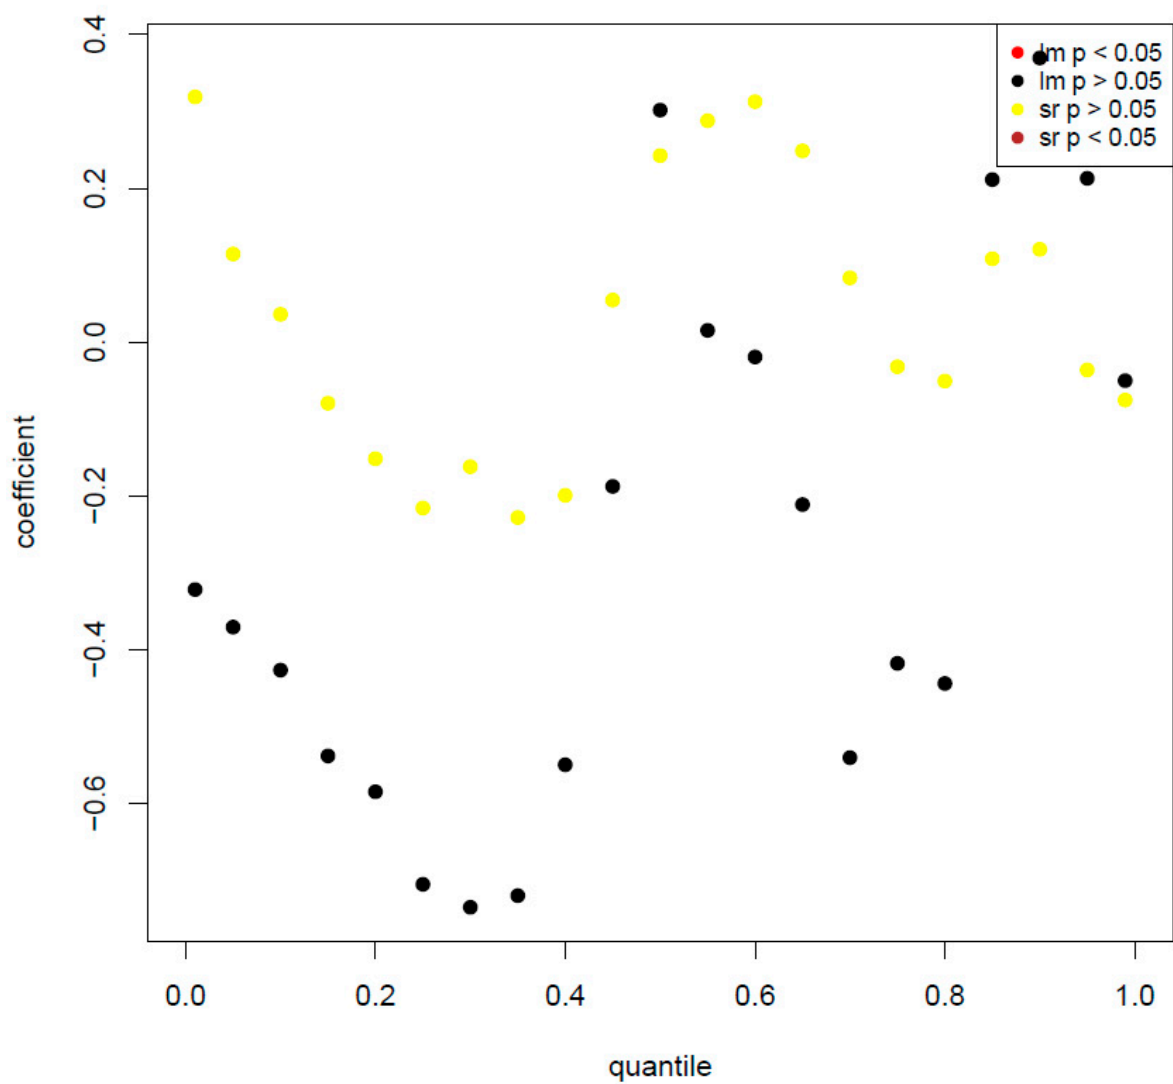

**Figure S2. Trend and correlation significance between friction slope and top width error for the 1% AEP flow at Bronx Wash. “lm” indicates the ordinary least squares regression and “sr” indicates Spearman’s  $\rho$ .**

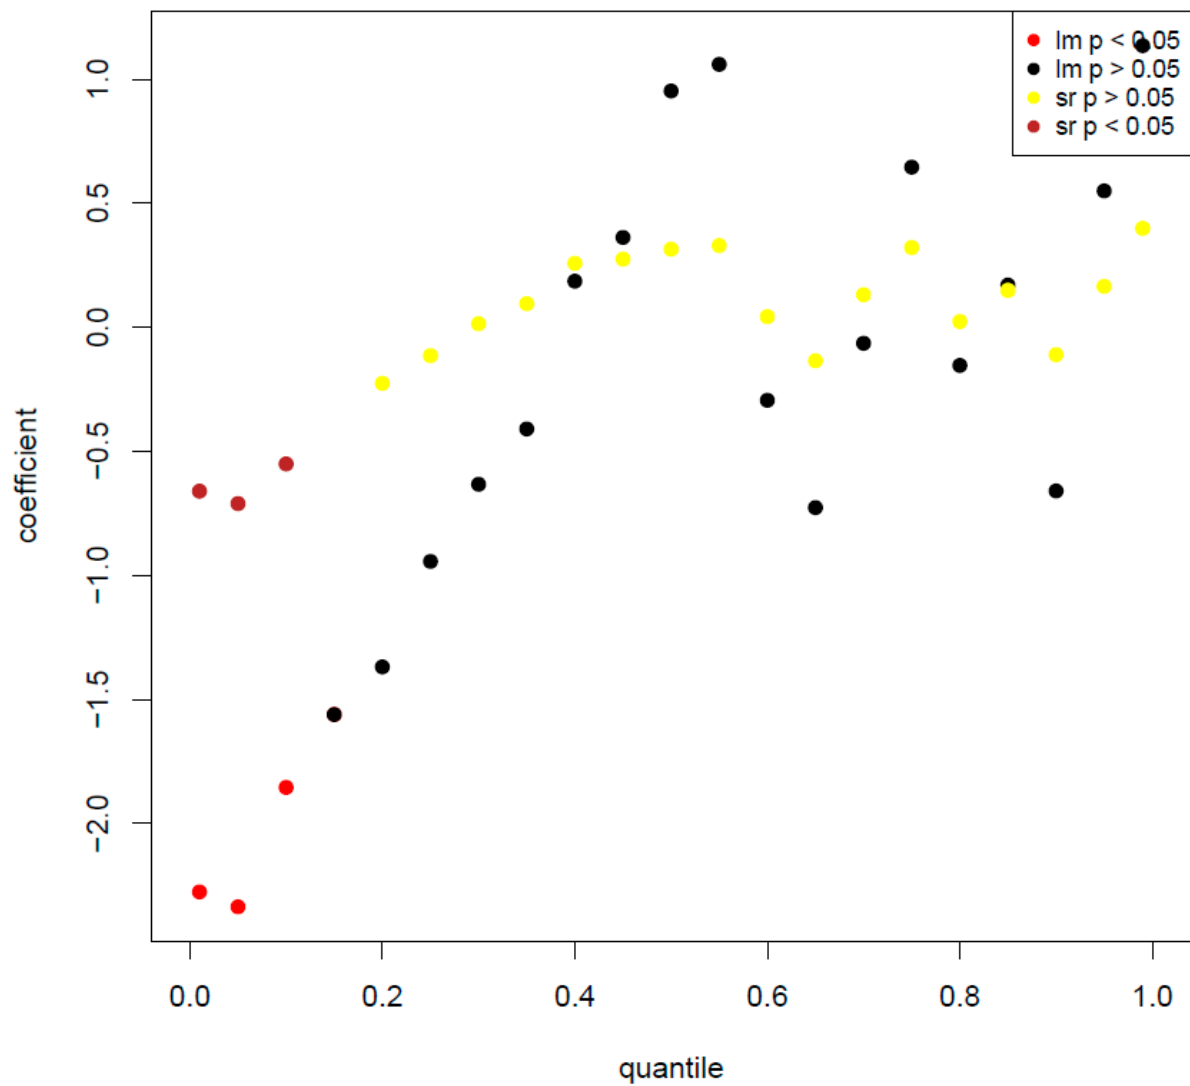

**Figure S3. Trend and correlation significance between Froude number and top width error for the 1% AEP flow at Bronx Wash. “lm” indicates the ordinary least squares regression and “sr” indicates Spearman’s  $\rho$ .**

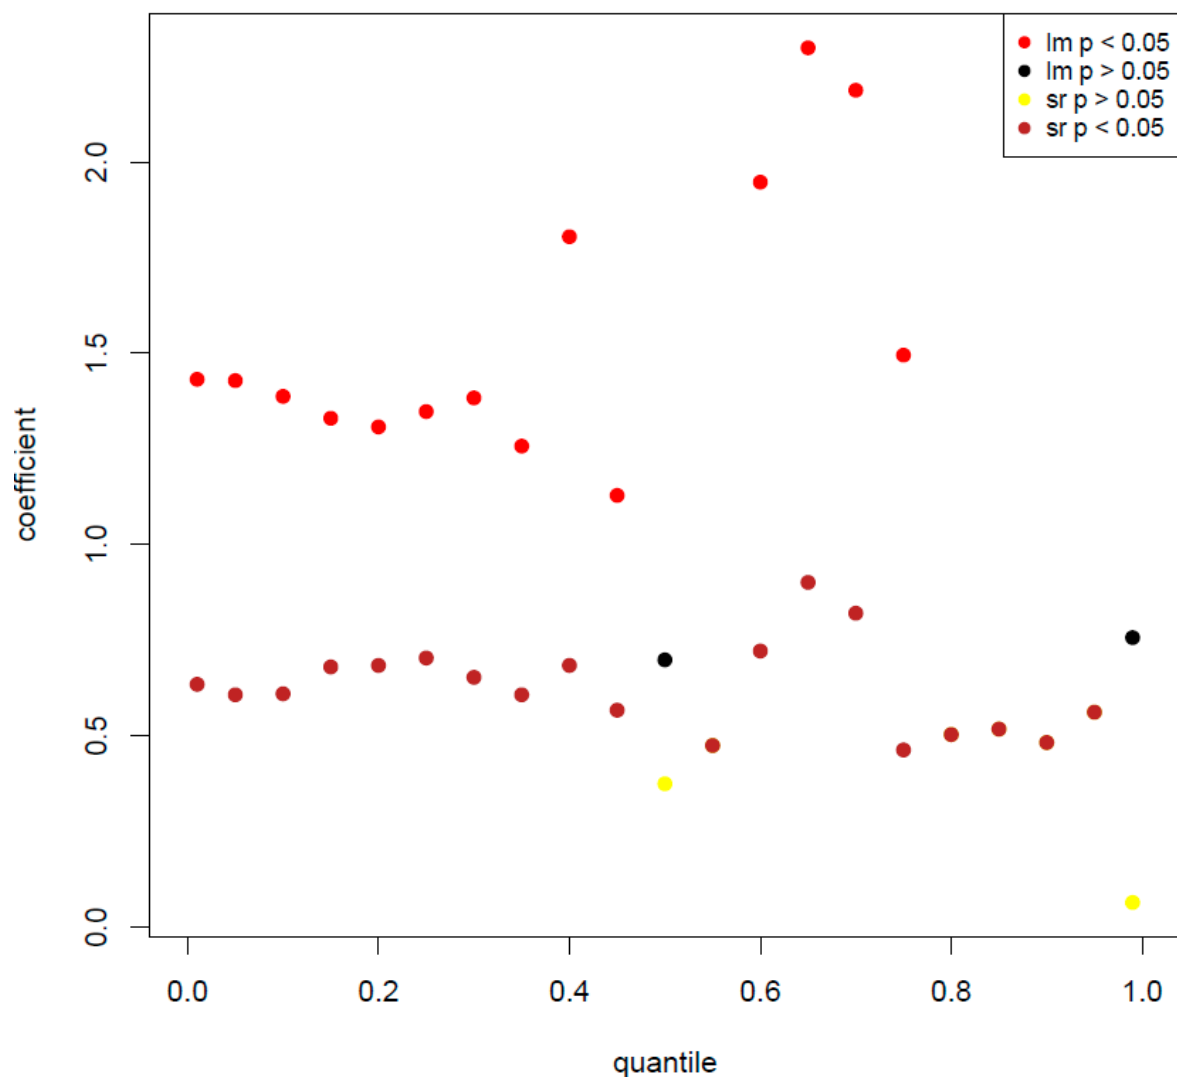

**Figure S4. Trend and correlation significance between confinement ratio and top width error for the 2% AEP flow at Bronx Wash. “lm” indicates the ordinary least squares regression and “sr” indicates Spearman’s  $\rho$ .**

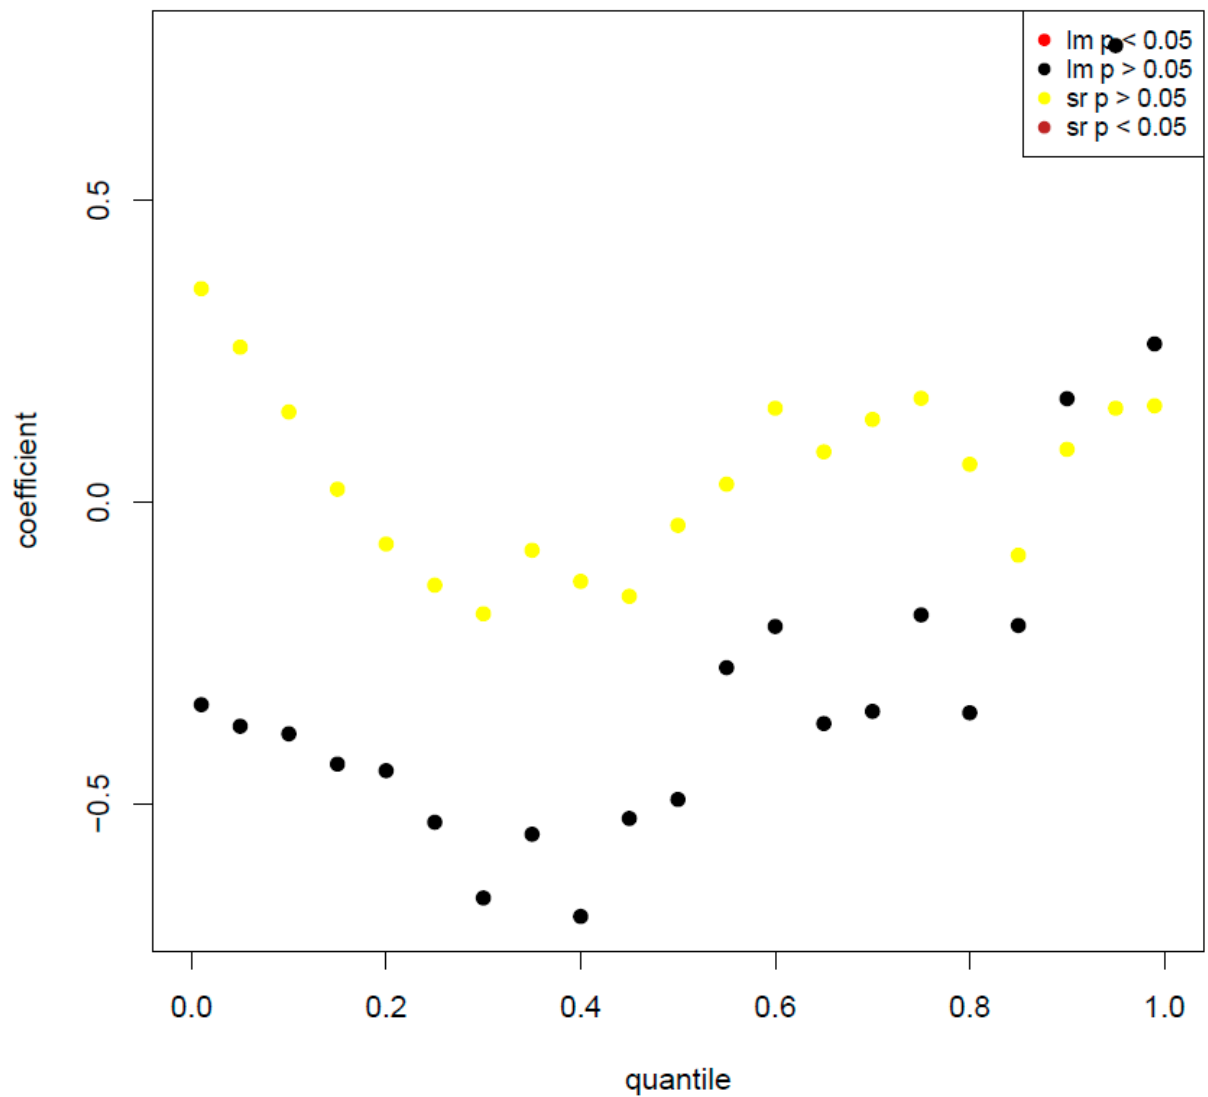

**Figure S5. Trend and correlation significance between friction slope and top width error for the 2% AEP flow at Bronx Wash. “lm” indicates the ordinary least squares regression and “sr” indicates Spearman’s  $\rho$ .**

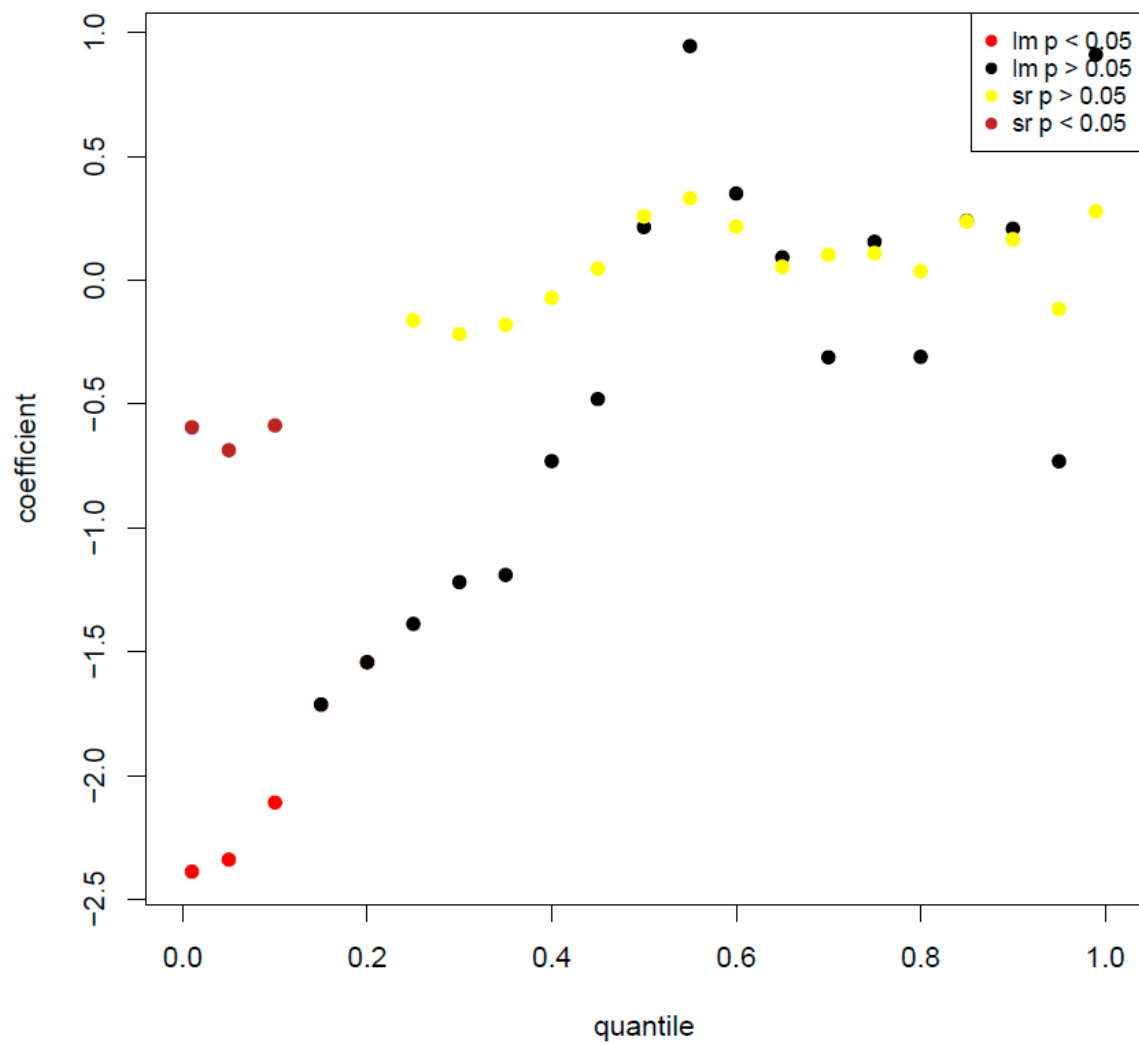

**Figure S6. Trend and correlation significance between Froude number and top width error for the 2% AEP flow at Bronx Wash. “lm” indicates the ordinary least squares regression and “sr” indicates Spearman’s  $\rho$ .**

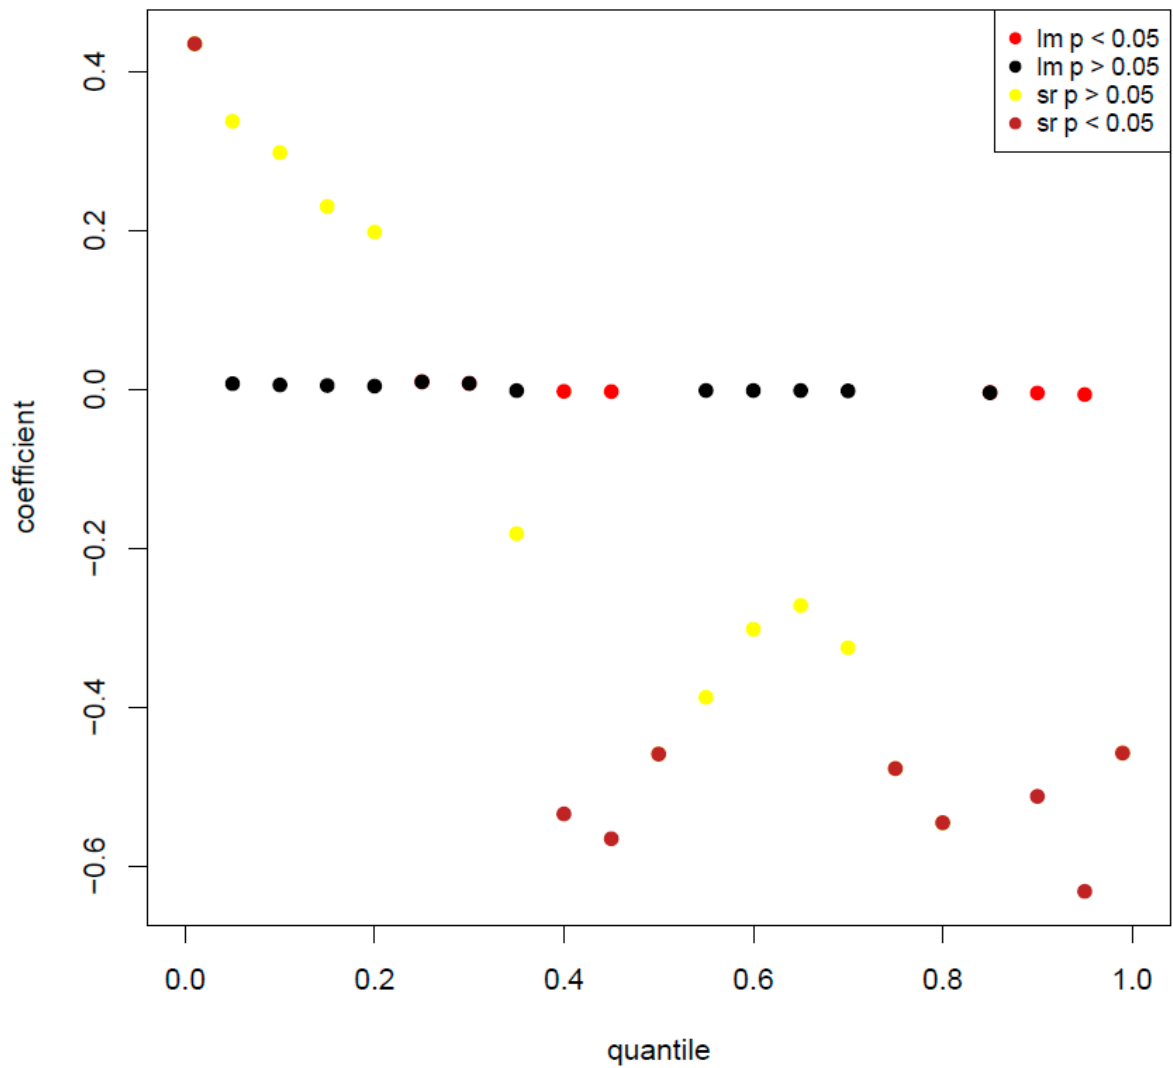

**Figure S7. Trend and correlation significance between confinement ratio and depth error for the 1% AEP flow at Bronx Wash. “lm” indicates the ordinary least squares regression and “sr” indicates Spearman’s  $\rho$ .**

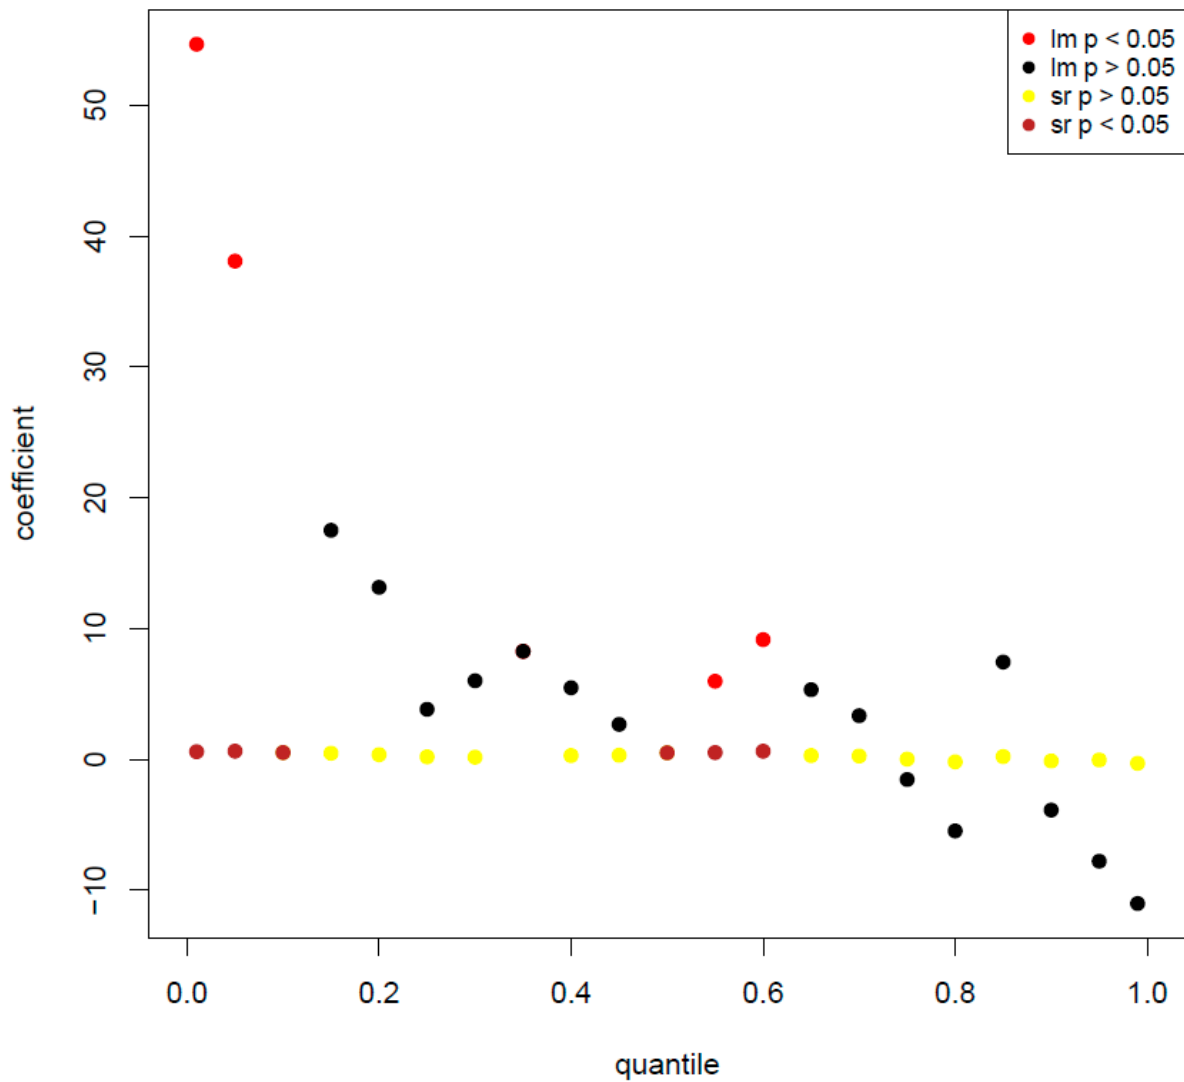

**Figure S8. Trend and correlation significance between friction slope and depth error for the 1% AEP flow at Bronx Wash. “lm” indicates the ordinary least squares regression and “sr” indicates Spearman’s  $\rho$ .**



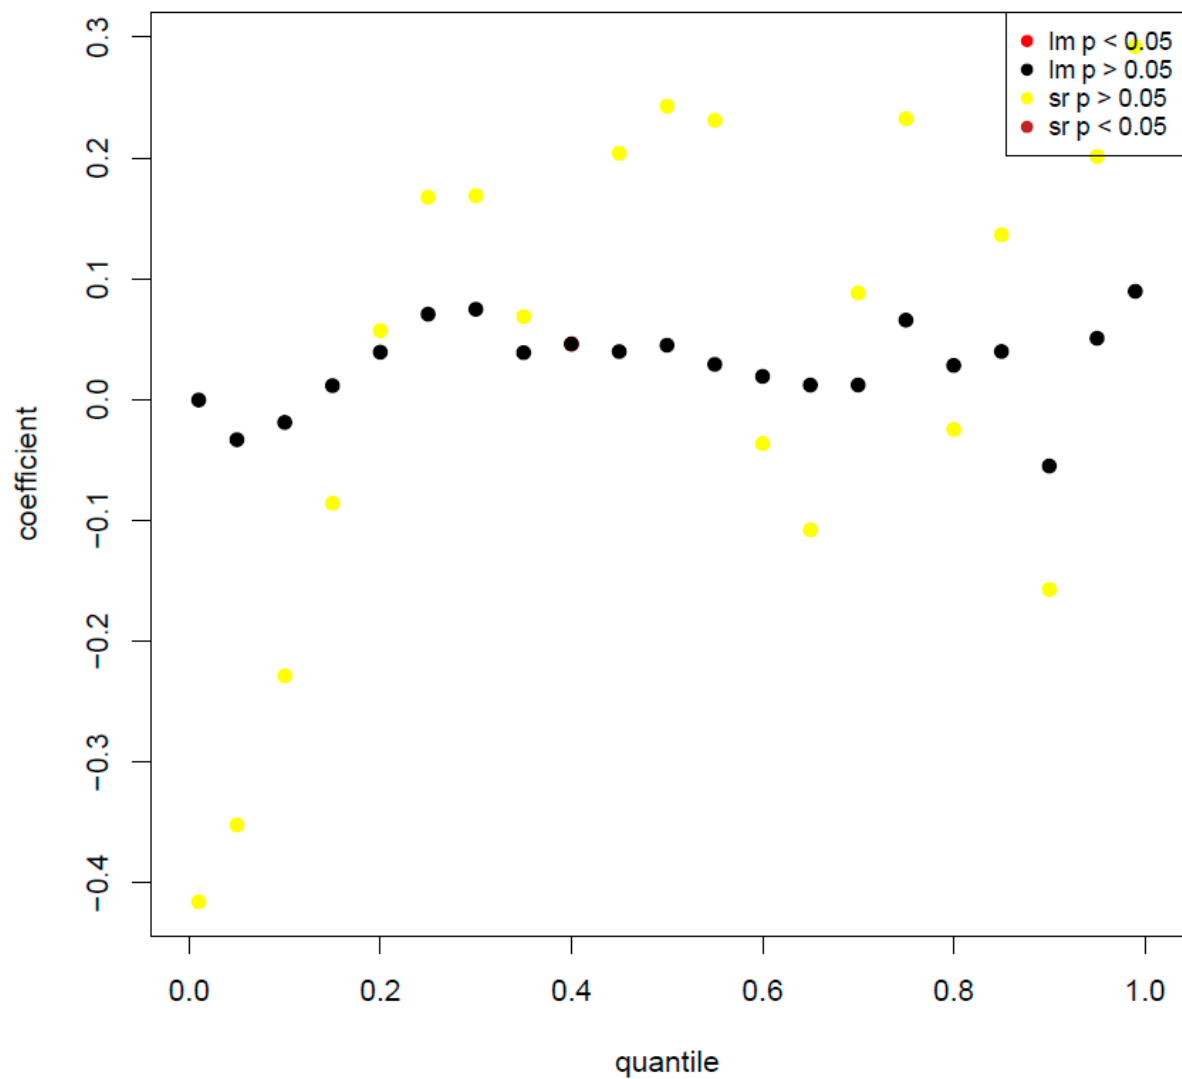

**Figure S9. Trend and correlation significance between Froude number and depth error for the 1% AEP flow at Bronx Wash. “lm” indicates the ordinary least squares regression and “sr” indicates Spearman’s  $\rho$ .**

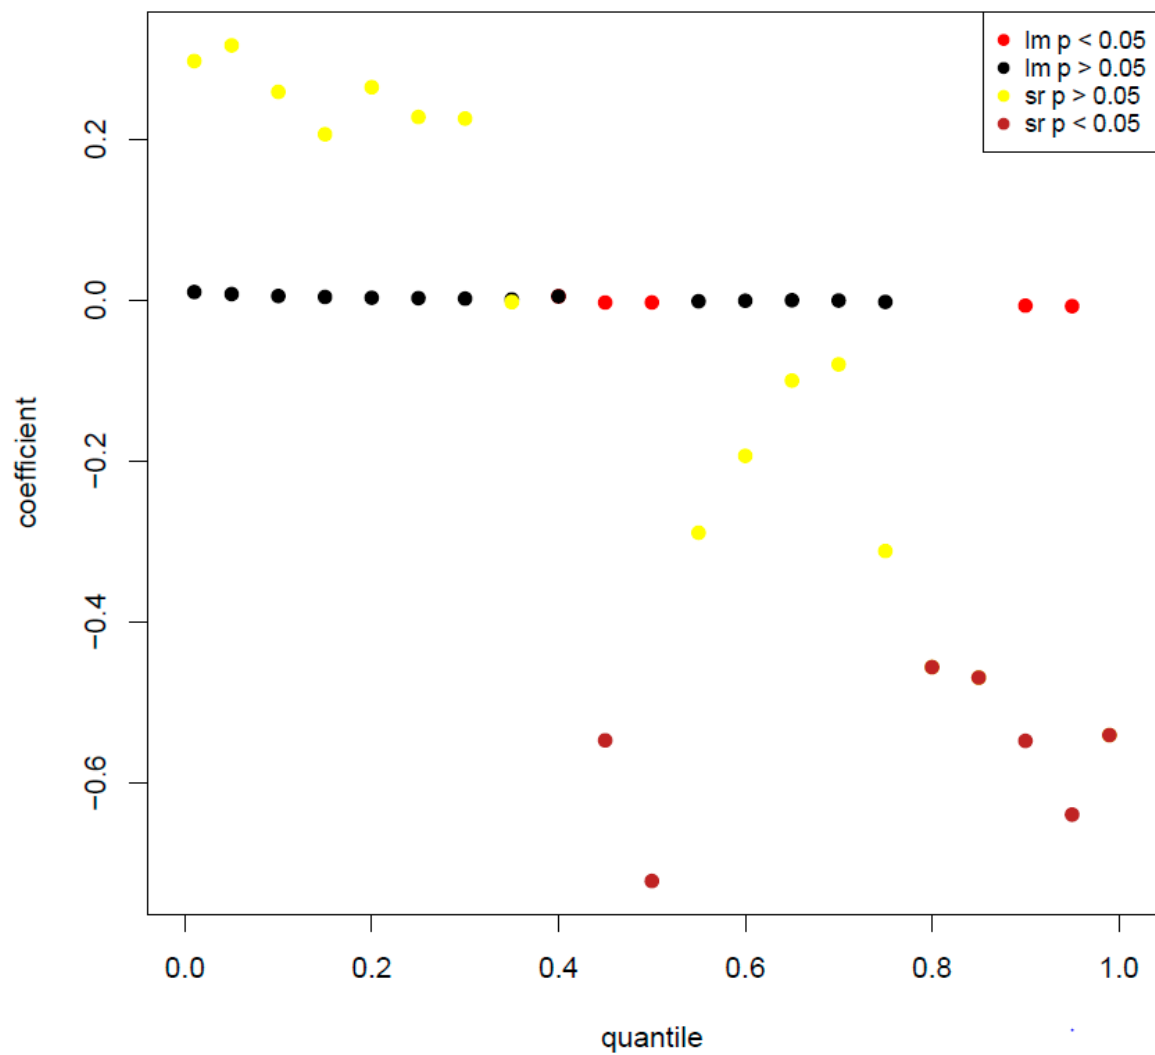

**Figure S10. Trend and correlation significance between confinement ratio and depth error for the 2% AEP flow at Bronx Wash. “lm” indicates the ordinary least squares regression and “sr” indicates Spearman’s  $\rho$ .**

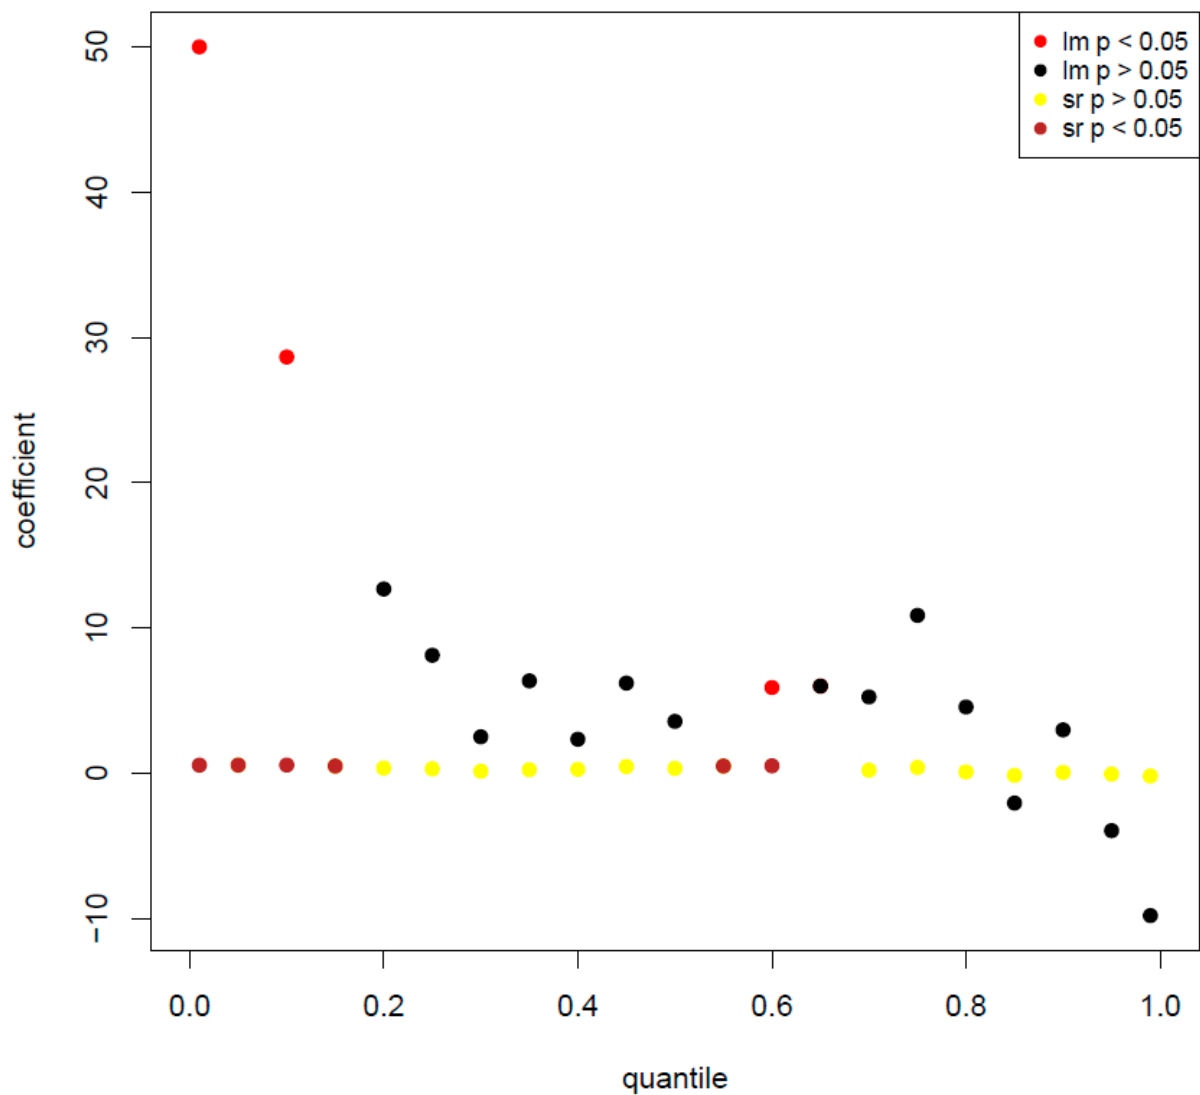

**Figure S11. Trend and correlation significance between friction slope and depth error for the 2% AEP flow at Bronx Wash. “lm” indicates the ordinary least squares regression and “sr” indicates Spearman’s  $\rho$ .**

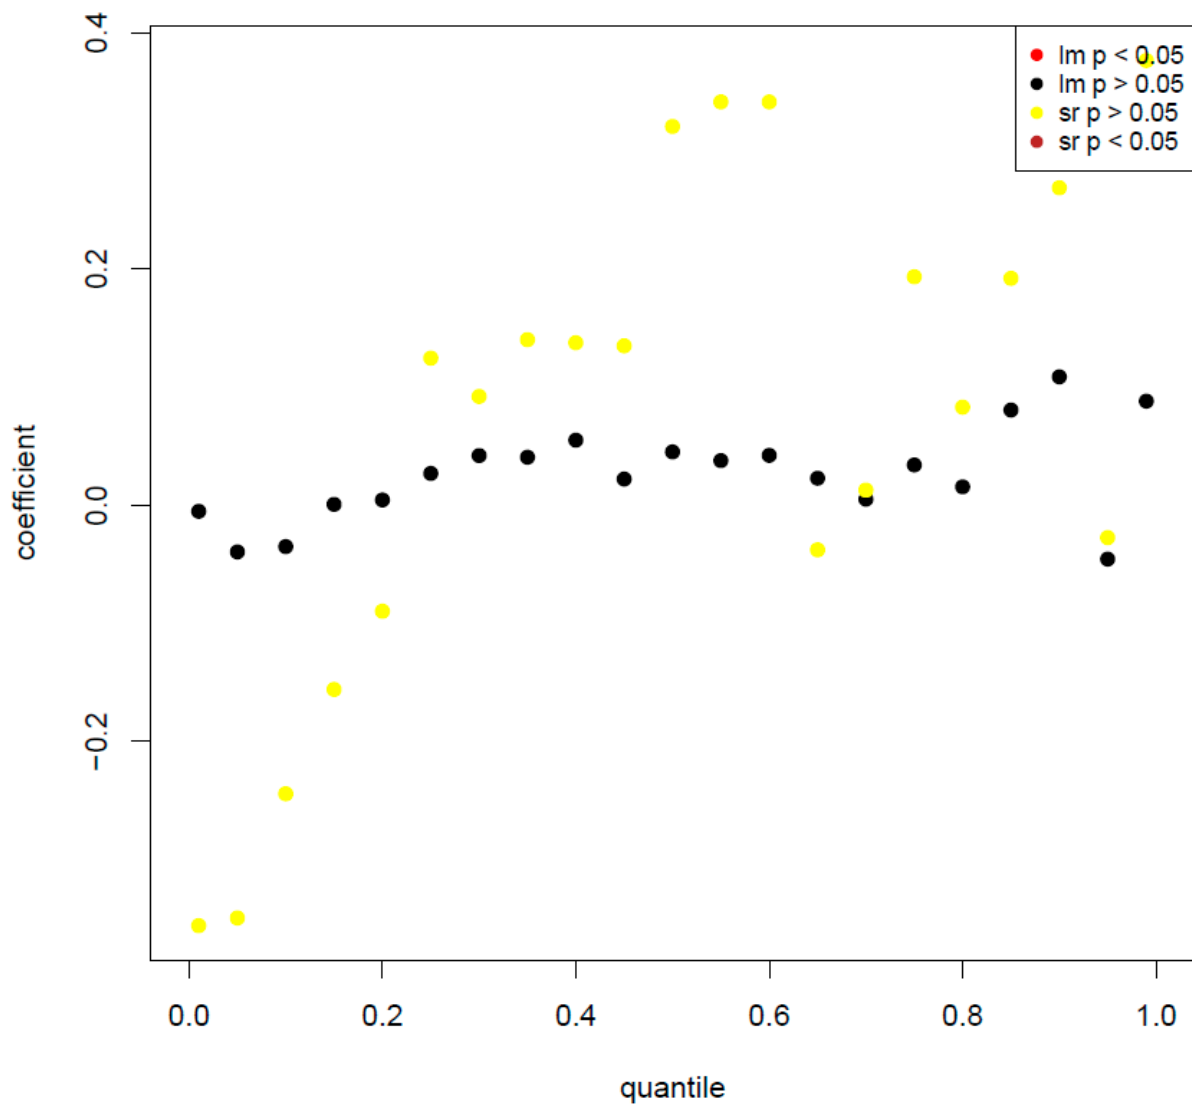

**Figure S12. Trend and correlation significance between Froude number and depth error for the 2% AEP flow at Bronx Wash. “lm” indicates the ordinary least squares regression and “sr” indicates Spearman’s  $\rho$ .**

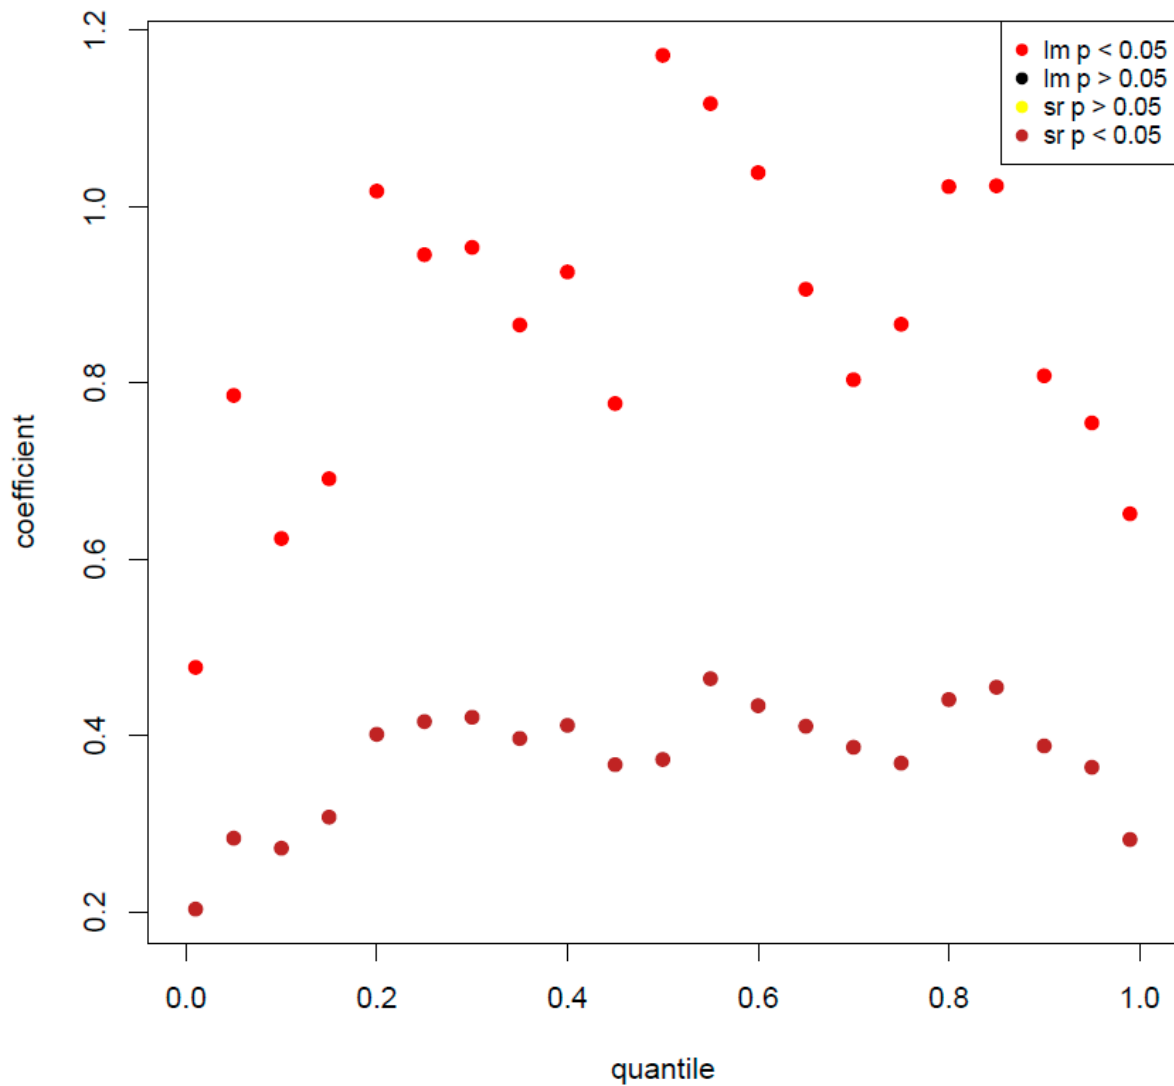

**Figure S13. Trend and correlation significance between confinement ratio and top width error for the 1% AEP flow at Proctor Creek. “lm” indicates the ordinary least squares regression and “sr” indicates Spearman’s  $\rho$ .**

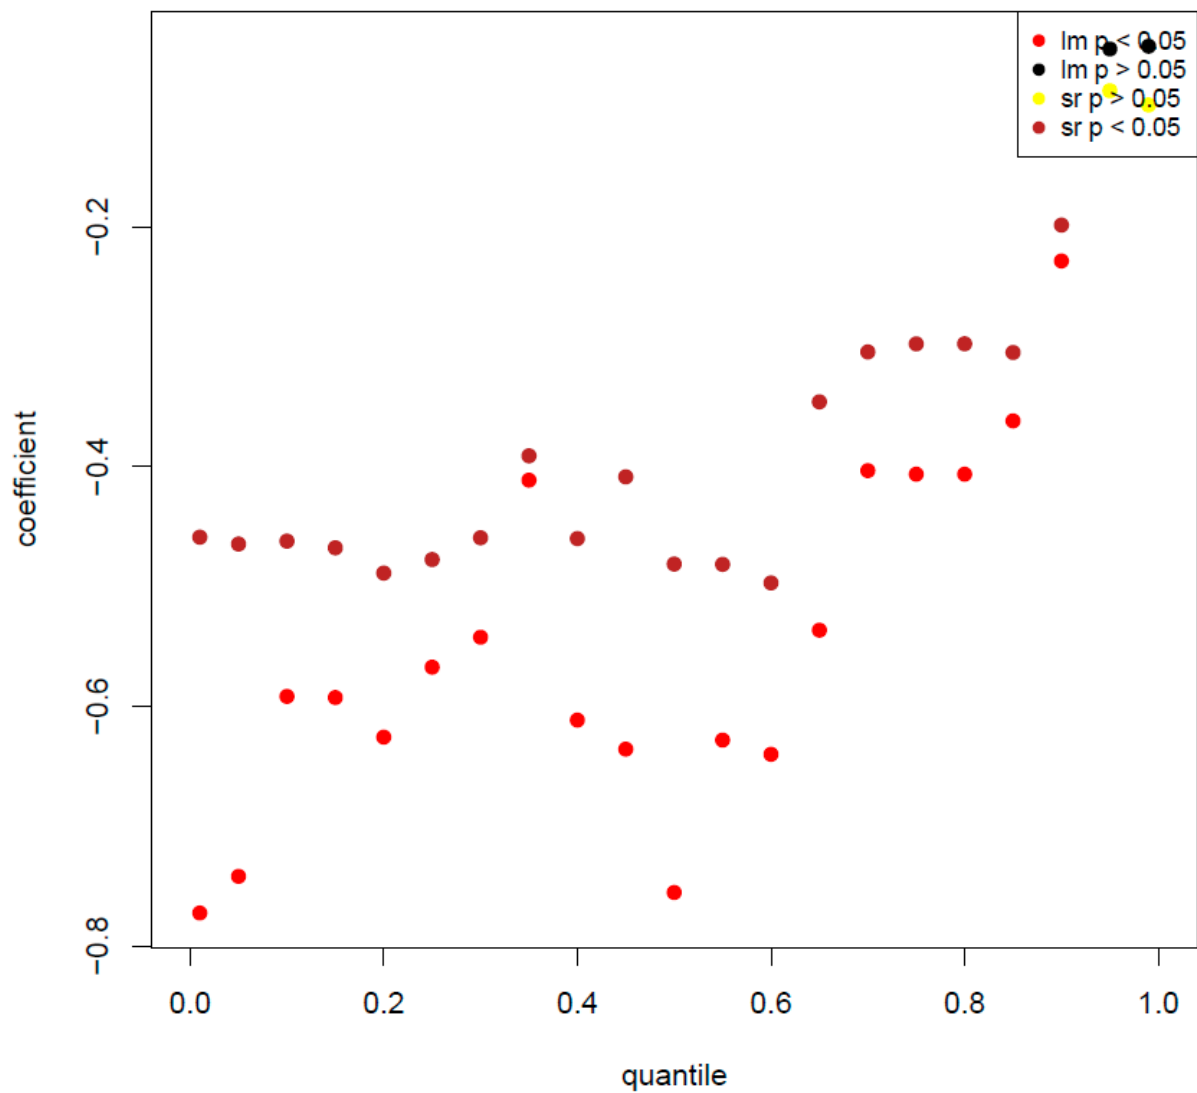

**Figure S14. Trend and correlation significance between friction slope and top width error for the 1% AEP flow at Proctor Creek. “lm” indicates the ordinary least squares regression and “sr” indicates Spearman’s  $\rho$ .**

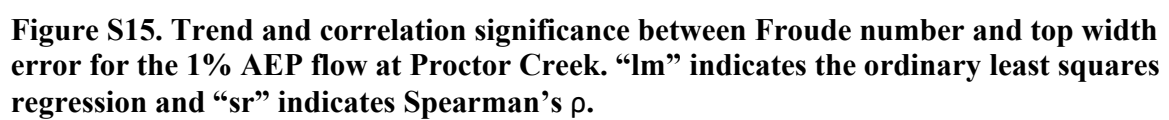

**Figure S15. Trend and correlation significance between Froude number and top width error for the 1% AEP flow at Proctor Creek. “lm” indicates the ordinary least squares regression and “sr” indicates Spearman’s  $\rho$ .**

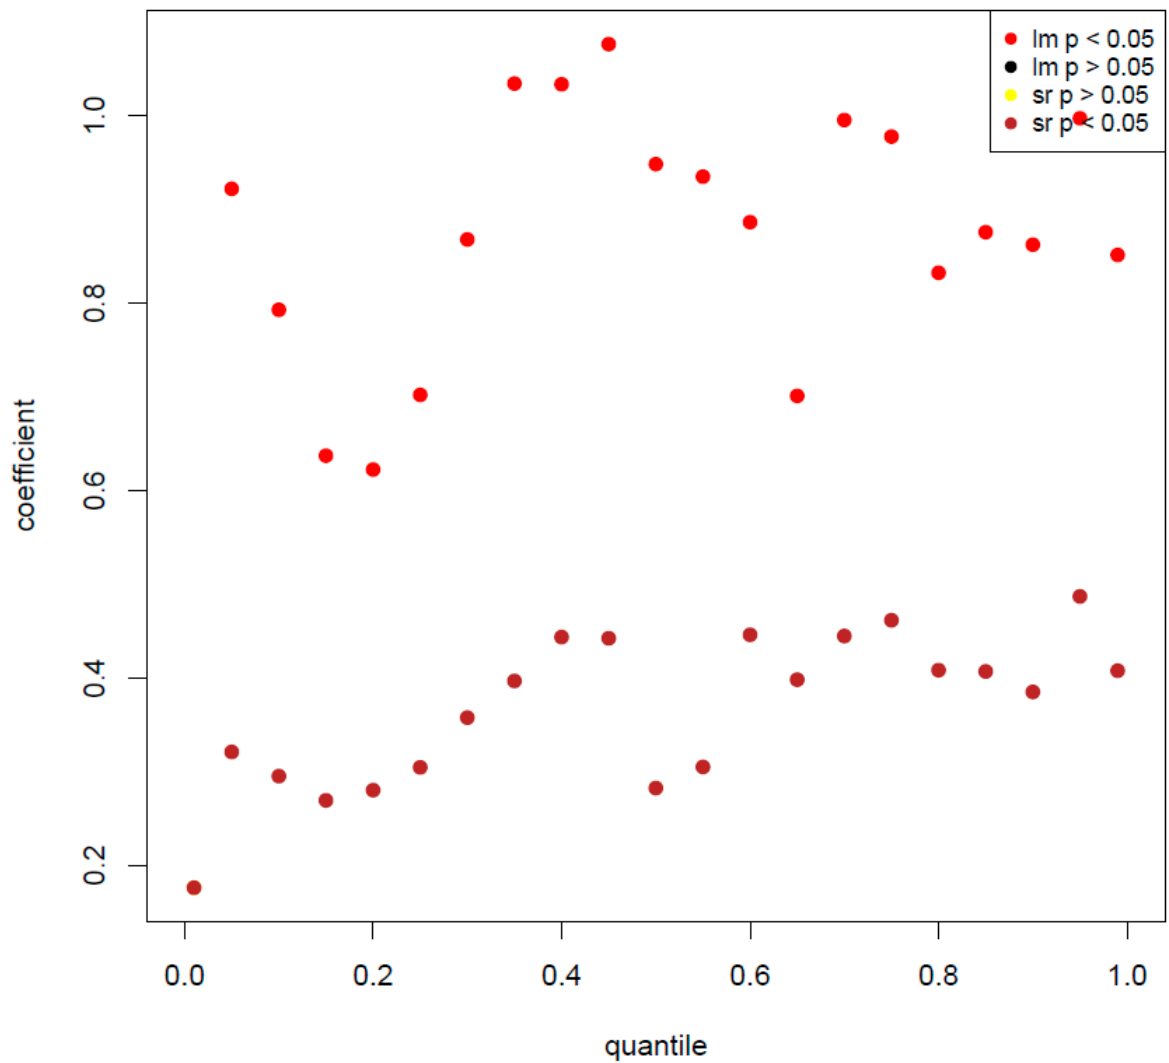

**Figure S16. Trend and correlation significance between confinement ratio and top width error for the 2% AEP flow at Proctor Creek. “lm” indicates the ordinary least squares regression and “sr” indicates Spearman’s  $\rho$ .**



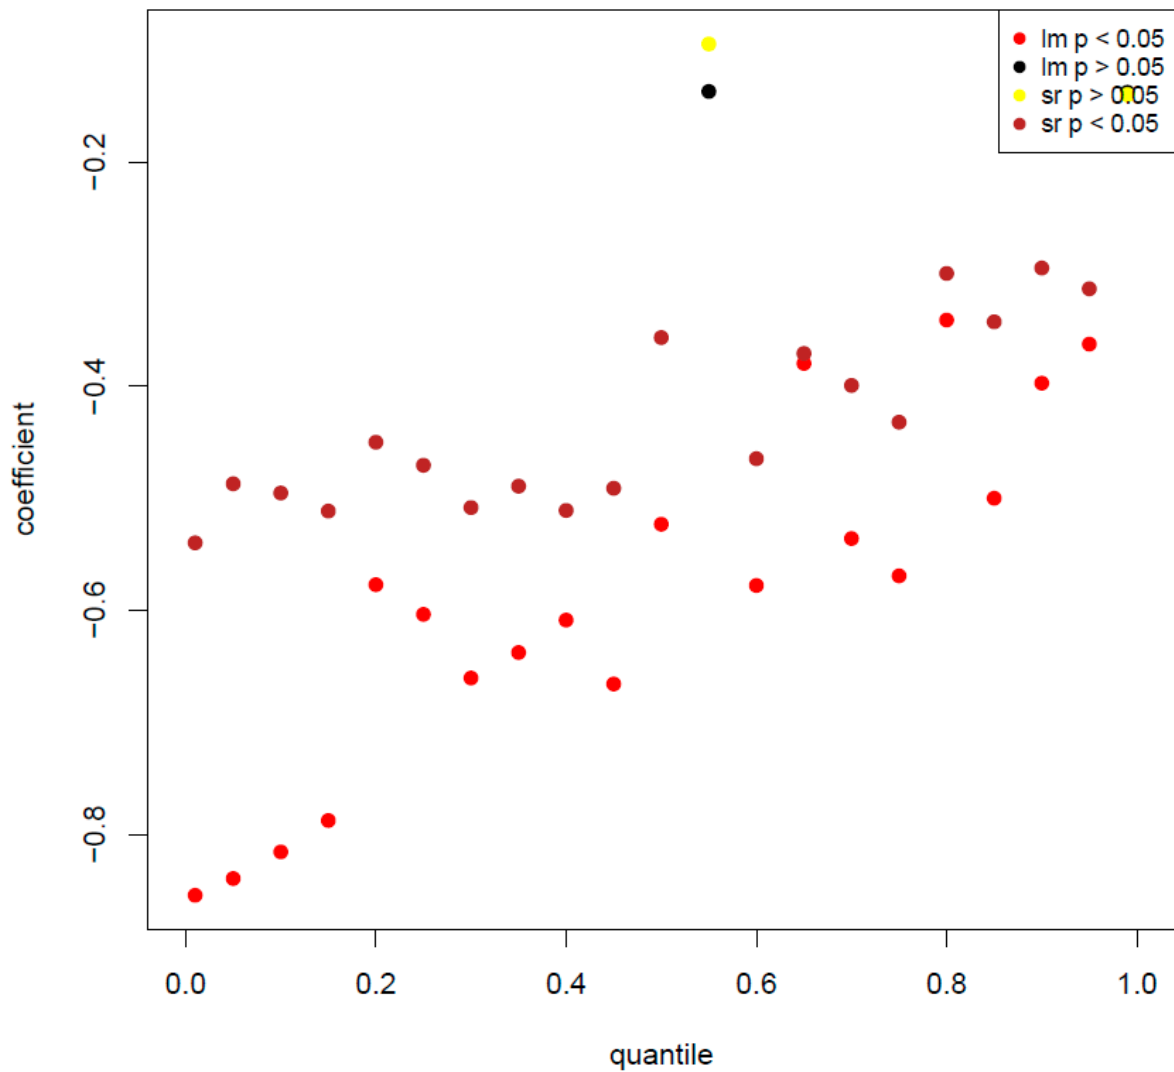

**Figure S17. Trend and correlation significance between friction slope and top width error for the 2% AEP flow at Proctor Creek. “lm” indicates the ordinary least squares regression and “sr” indicates Spearman’s  $\rho$ .**

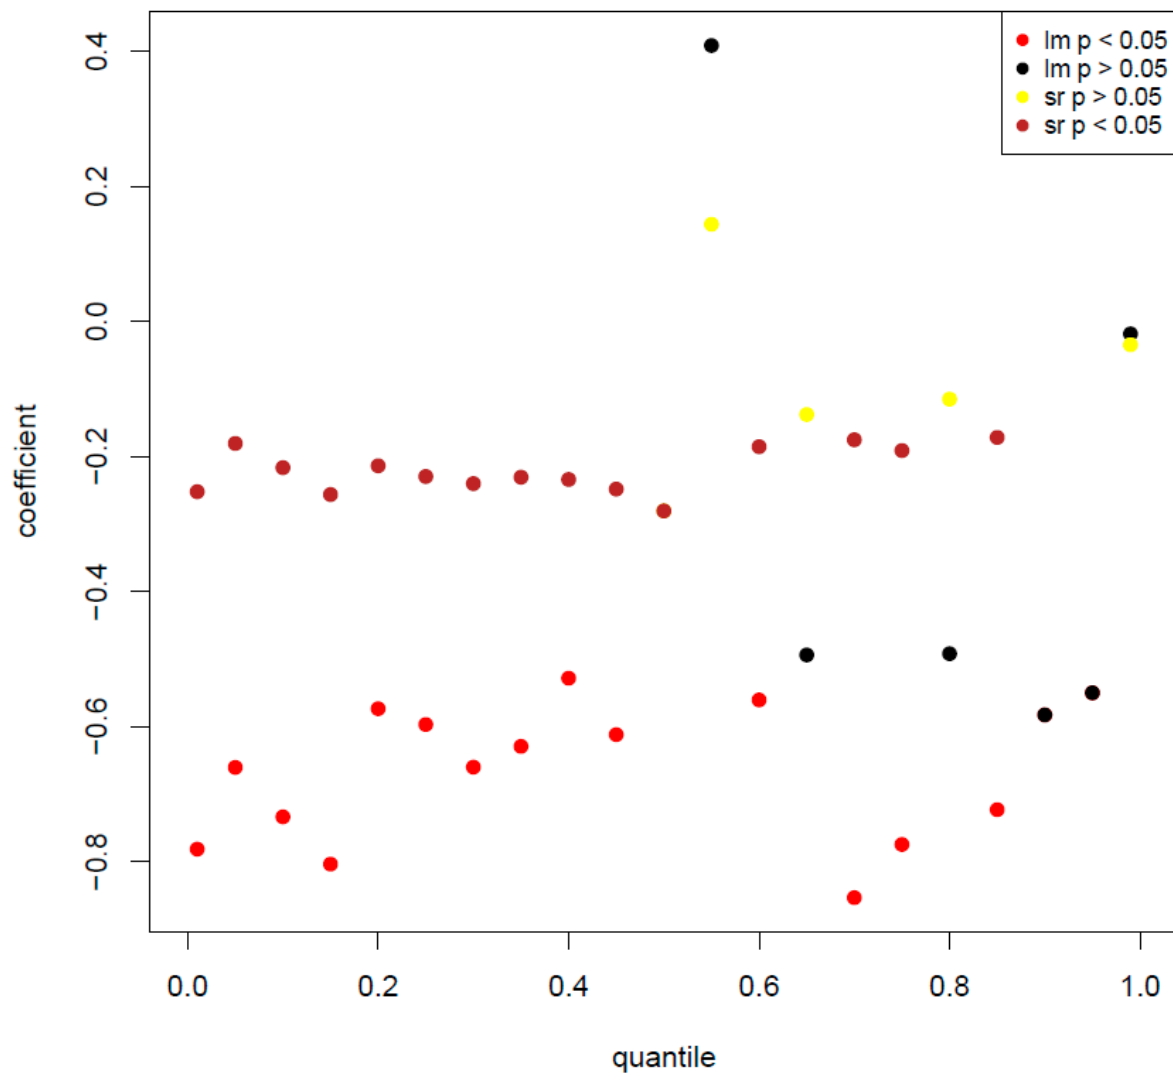

**Figure S18. Trend and correlation significance between Froude number and top width error for the 2% AEP flow at Bronx Wash. “lm” indicates the ordinary least squares regression and “sr” indicates Spearman’s  $\rho$ .**

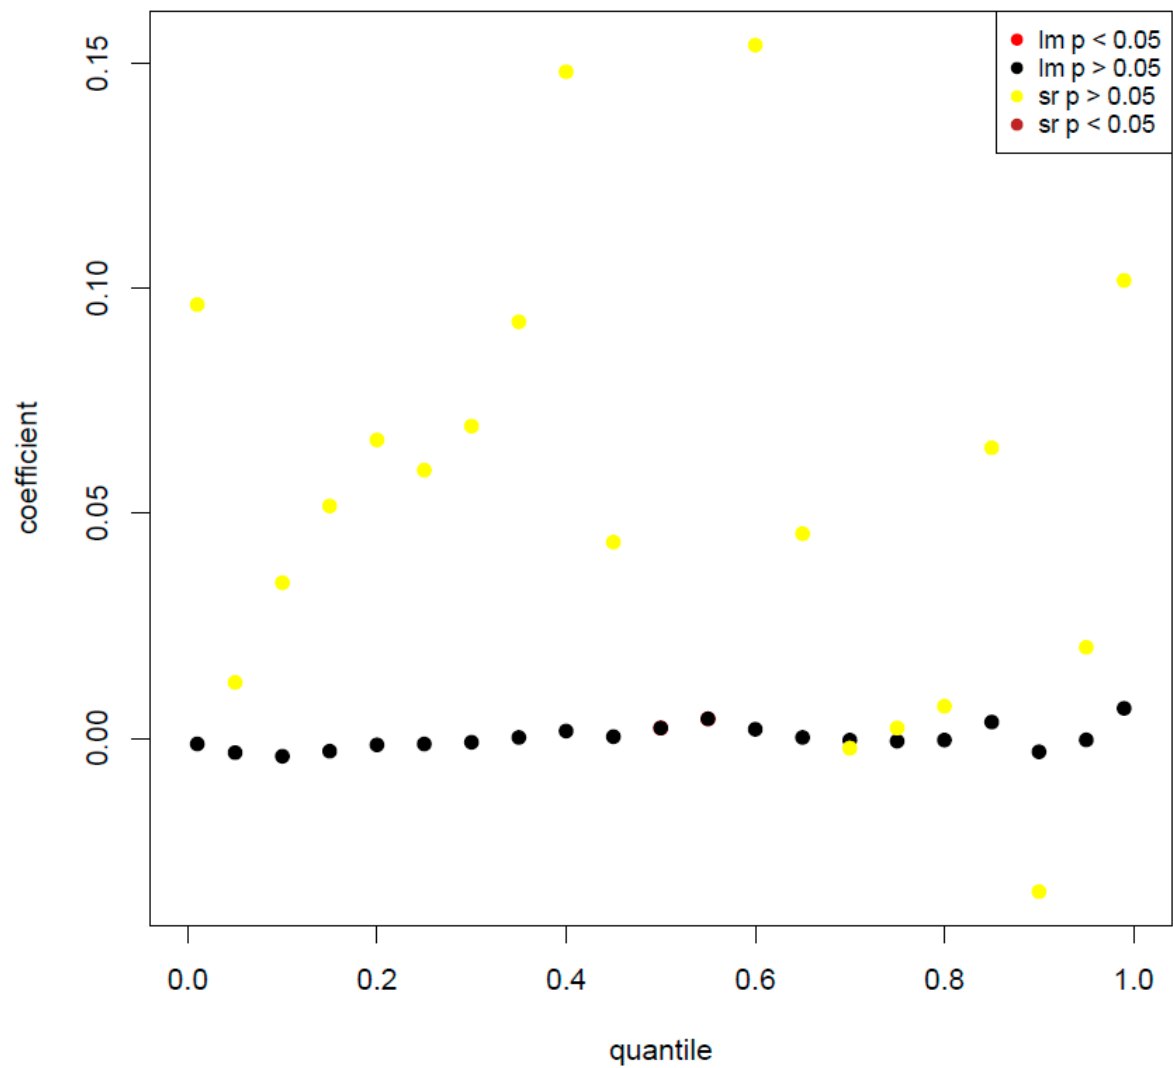

**Figure S19.** Trend and correlation significance between confinement ratio and depth error for the 1% AEP flow at Proctor Creek. “lm” indicates the ordinary least squares regression and “sr” indicates Spearman’s  $\rho$ .

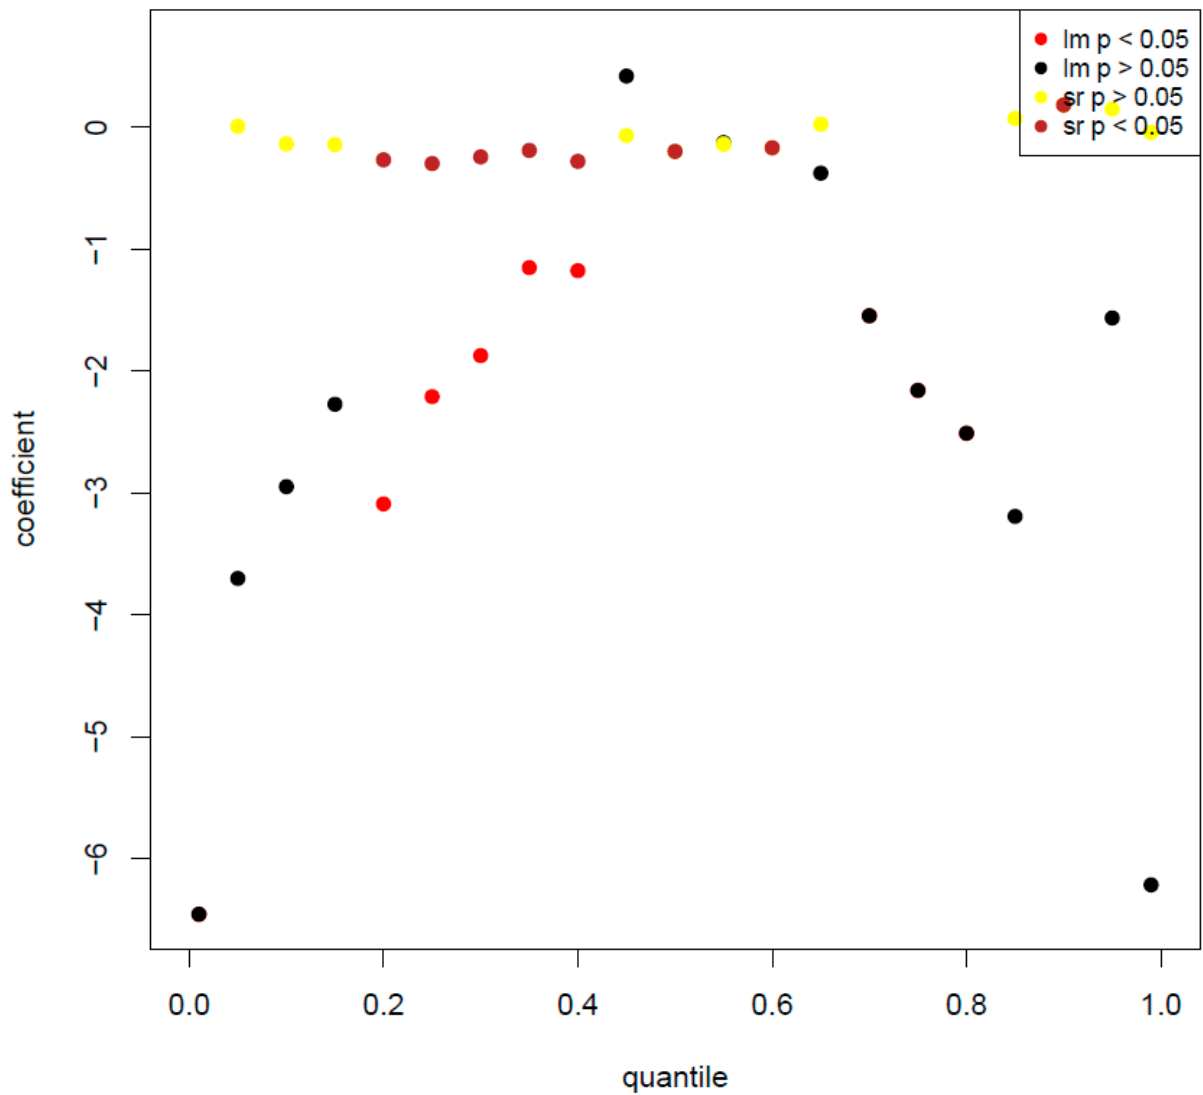

**Figure S20. Trend and correlation significance between friction slope and depth error for the 1% AEP flow at Proctor Creek. “lm” indicates the ordinary least squares regression and “sr” indicates Spearman’s  $\rho$ .**

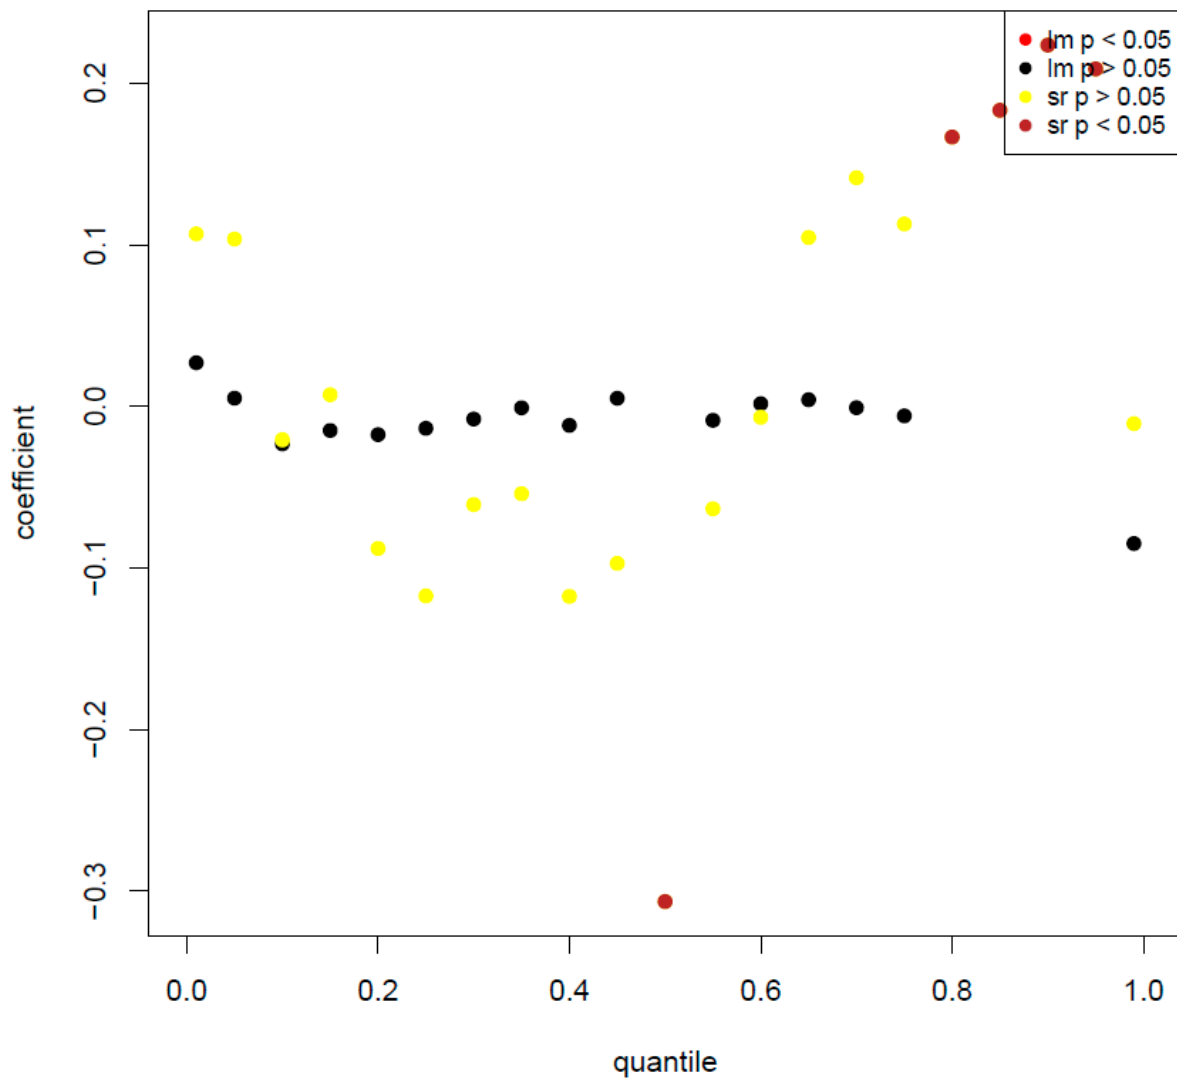

**Figure S21. Trend and correlation significance between Froude number and depth error for the 1% AEP flow at Proctor Creek. “lm” indicates the ordinary least squares regression and “sr” indicates Spearman’s  $\rho$ .**

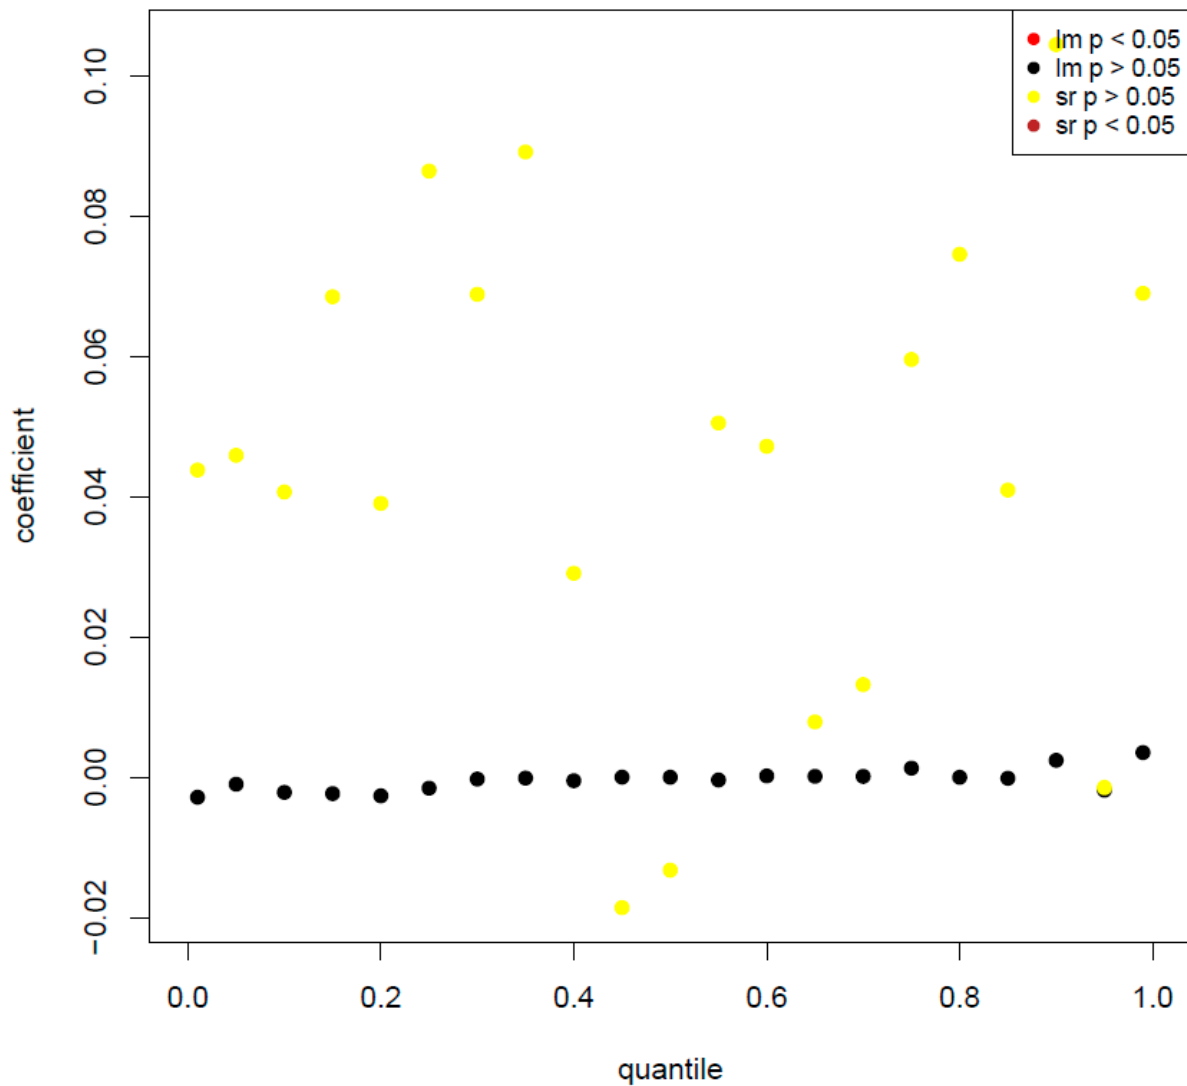

**Figure S22. Trend and correlation significance between confinement ratio and depth error for the 2% AEP flow at Proctor Creek. “lm” indicates the ordinary least squares regression and “sr” indicates Spearman’s  $\rho$ .**

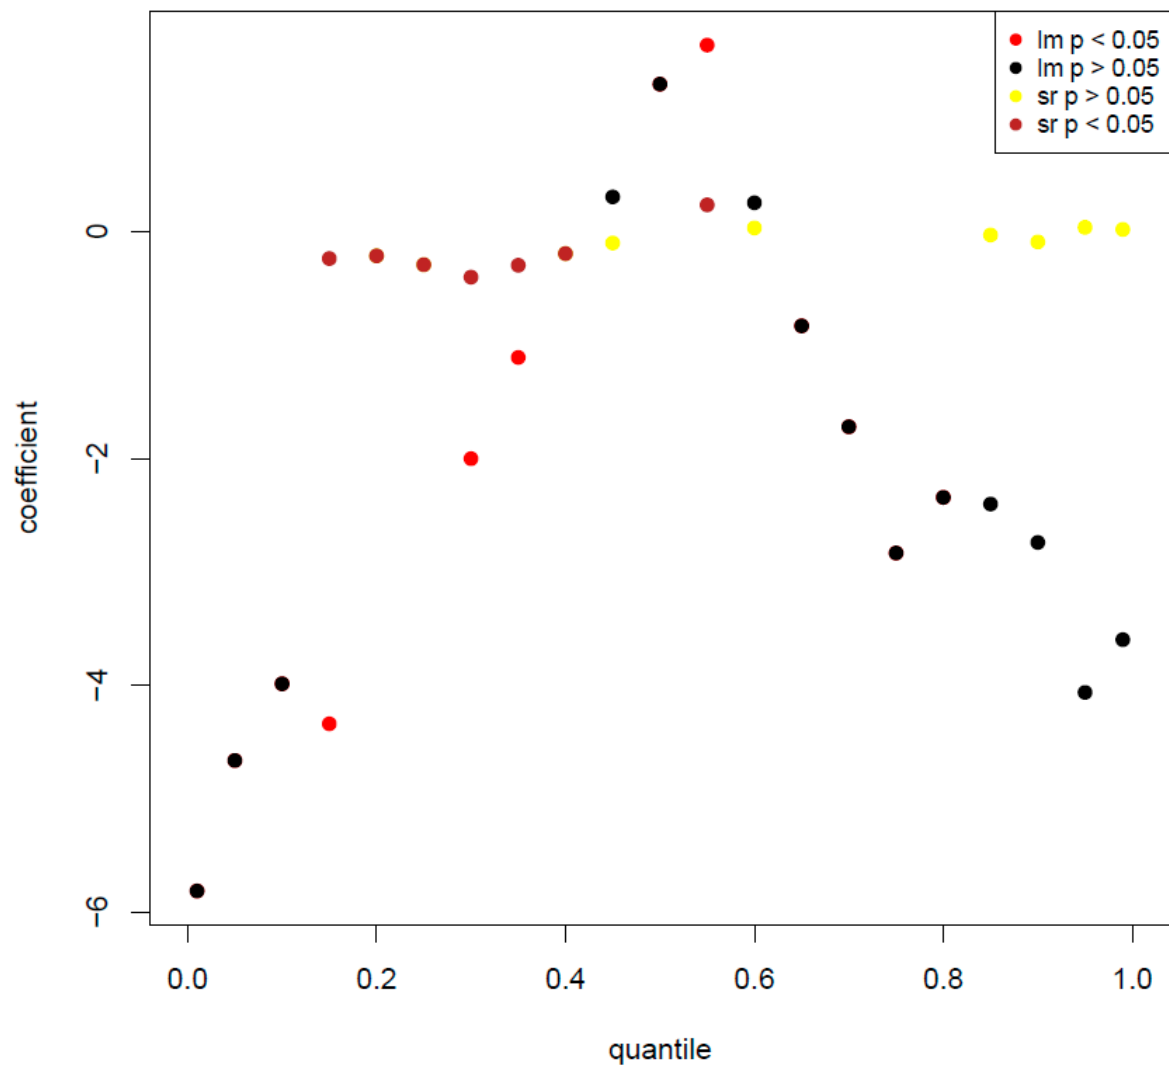

**Figure S23. Trend and correlation significance between friction slope and depth error for the 2% AEP flow at Proctor Creek. “lm” indicates the ordinary least squares regression and “sr” indicates Spearman’s  $\rho$ .**

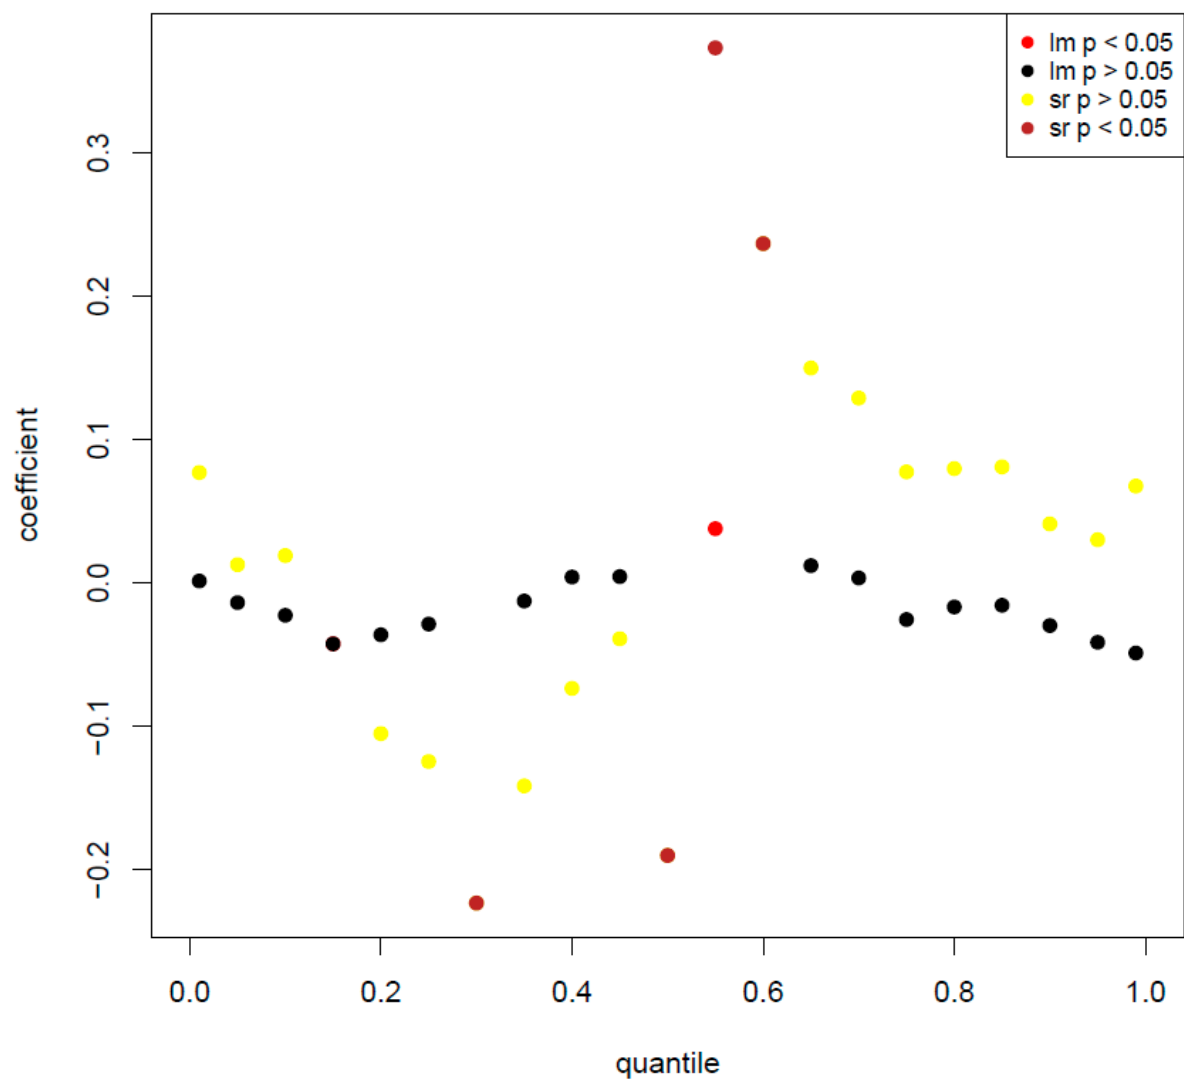

**Figure S24. Trend and correlation significance between Froude number and depth error for the 2% AEP flow at Proctor Creek. “lm” indicates the ordinary least squares regression and “sr” indicates Spearman’s  $\rho$ .**
